# Supplementary material for: Healthcare cost and utilization before and after the development of significant tricuspid regurgitation by age, sex and race
Source: Atypon-hosted journal article supplement (doi:10.57264/cer-2025-0146), 2025-12-11
Supplement: supplementary data.docx [file supplementary%20data.docx]

Supplemental Table 1a. Significant tricuspid regurgitation coding details.

| Condition | ICD9 | ICD10 | Lab value | Note algorithm |
| --- | --- | --- | --- | --- |
| Kidney disease | 403.00, 403.01, 403.10, 403.11, 403.90, 403.91, 404.00, 404.01, 404.02, 404.03, 404.10, 404.11, 404.12, 404.13, 404.90 | I12.0, I12.9, I13.0, I13.10, I13.11, I13.12, N18.1, N18.2, N18.3, N18.4, N18.5, N18.6, N18.9 | Creatinine >2,  Estimated glomerular filtration rate (eGFR) <30 | (“chronic kidney disease”, OR “kidney disease”, OR “kidney diseases”) AND (“diagnose” OR “exhibit” OR “have” OR “observe” OR “positive” OR “present”) |
| Liver disease | 070.22, 070.23, 070.32, 070.33, 070.44, 070.54, 070.6, 070.9, 456.0, 456.1, 456.20, 570, 571.0, 571.1, 571.2, 571.3, 571.40, 571.41, 571.42 | B18, B18.0, B18.1, B18.2, B18.8, B18.9, I85, I85.0, I85.00, I85.01, I85.1, I85.10, I85.11, I86.4, K70, K70.0, K70.1, K70.10, K70.11, K70.2 | Bilirubin >3,  Albumin <3.5,  AST > 75, ALT > 150 | (“abnormal liver function” OR “liver damage” OR “liver disease” OR “liver failure”) AND (“diagnose” OR “exhibit” OR “have” OR “observe” OR “positive” OR “present”) |
| Edema | 782.3 | R60.0 |  | (“brawny edema” OR “cardiogenic pulmonary edema” OR “edema” OR “interstitial edema” OR “leg edema” OR “local edema” OR “localized edema” OR “massive edema” OR “pedal edema” OR “peripheral edema” OR “pitting edema”) AND (“diagnose” OR “exhibit” OR “have” OR “observe” OR “positive” OR “present”) |
| Ascites | 789.59 | R18.8 |  | (“ascites” OR “cardiac ascites”) AND (“diagnose” OR “exhibit” OR “have” OR “observe” OR “positive” OR “present”) |
| Severe weight loss |  |  |  | (“weight loss”) AND (“diagnose” OR “exhibit” OR “have” OR “observe” OR “positive” OR “present”) |
| Fatigue |  |  |  | (“chronic fatigue syndrome” OR “extreme fatigue”) AND (“diagnose” OR “exhibit” OR “have” “observe” OR “positive” OR “present”) |
| Right ventricular dysfunction |  |  |  | (“right ventricular failure” OR “right ventricular systolic dysfunction” OR “right ventricular dysfunction”) OR  ((“systolic dysfunction” OR “dysfunction”) AND (“rv” OR “right ventricle”)) |

Supplemental Table 1b: Cohort selection criteria distribution.

| **Which cohort entry criteria was identified first?** |  |
| --- | --- |
| Clinical symptoms | 78,585 (99.4%) |
| Severe and above TR note | 405 (0.5%) |
| Both at the same time | 56 (0.1%) |
| **Percent of patients with cohort entry symptom at time of significant TR (index encounter)** |  |
| Kidney disease | 95.8% |
| Liver disease | 93.2% |
| Edema | 90.7% |
| Ascites | 16.7% |
| Weight loss | 7.8% |
| Fatigue | 0.1% |
| Right ventricular dysfunction | 0.1% |

Supplemental Table 2. Tukey’s Honestly Significant Difference tests for Figure 2C.

|  | Year -3 | | | Year -2 | | | Year -1 | | | Year +1 | | |
| --- | --- | --- | --- | --- | --- | --- | --- | --- | --- | --- | --- | --- |
|  | H v W | B v W | B v H | H v W | B v W | B v H | H v W | B v W | B v H | H v W | B v W | B v H |
| Total medical costs | <0.01 | <0.01 | 0.89 | <0.01 | <0.01 | 0.99 | <0.01 | <0.01 | <0.01 | <0.01 | <0.01 | <0.01 |
| Inpatient medical costs | <0.01 | <0.01 | 0.83 | <0.01 | <0.01 | 0.82 | <0.01 | <0.01 | <0.01 | <0.01 | <0.01 | <0.01 |
| CV medical costs | <0.01 | <0.01 | 0.99 | <0.01 | <0.01 | 0.40 | <0.01 | <0.01 | <0.01 | <0.01 | <0.01 | <0.01 |
| HF medical costs | <0.01 | <0.01 | 0.78 | <0.01 | <0.01 | <0.01 | <0.01 | <0.01 | <0.01 | <0.01 | <0.01 | <0.01 |
| All cause admissions | <0.01 | <0.01 | <0.01 | <0.01 | <0.01 | <0.01 | <0.01 | <0.01 | <0.01 | <0.01 | <0.01 | <0.01 |
| CV admissions | <0.05 | <0.01 | <0.01 | <0.01 | <0.01 | <0.01 | <0.01 | <0.01 | <0.01 | <0.05 | <0.01 | <0.01 |
| HF admissions | <0.05 | <0.01 | <0.01 | <0.01 | <0.01 | <0.01 | <0.01 | <0.01 | <0.01 | 0.64 | <0.01 | <0.01 |
| Urgent/emergent admissions | 0.10 | <0.01 | <0.01 | 0.08 | <0.01 | <0.01 | <0.01 | <0.01 | <0.01 | 0.84 | <0.01 | <0.01 |
| Hospital Days | <0.01 | <0.01 | 0.31 | <0.01 | <0.01 | 0.22 | <0.01 | <0.01 | <0.01 | <0.01 | <0.01 | <0.01 |
| ED Visits | <0.01 | <0.01 | 0.09 | <0.01 | <0.01 | <0.01 | <0.01 | <0.01 | <0.01 | <0.01 | <0.01 | <0.01 |
| OP visits | 0.44 | <0.01 | <0.01 | 0.06 | <0.01 | <0.01 | <0.01 | <0.01 | <0.01 | 0.29 | <0.01 | <0.01 |
| Cardiac specialist | <0.01 | <0.01 | <0.05 | <0.01 | <0.01 | 0.07 | <0.01 | <0.01 | 0.10 | <0.01 | <0.01 | <0.05 |
| H v W, Hispanic vs. White; B v W, Black vs. White; B v H, Black vs. Hispanic; CV, cardiovascular; HF, heart failure; ED, emergency department; OP, outpatient | | | | | | | | | | | | |
